# Supplementary material for: Fermented Soy-Derived Bioactive Peptides Selected by a Molecular Docking Approach Show Antioxidant Properties Involving the Keap1/Nrf2 Pathway
Source: PubMed Central journal article supplement (PMC7765838; doi:10.3390/antiox9121306), 2020-12-19
Supplement: antioxidants-09-01306-s001.pdf [file antioxidants-09-01306-s001.pdf]

# Fermented soy-derived bioactive peptides selected by a molecular docking approach show antioxidant properties involving the Keap1/Nrf2 pathway in a cellular model

Federica Tonolo <sup>1, #</sup>, Laura Moretto <sup>1, #</sup>, Alessandro Grinzato <sup>1, #</sup>, Federico Fiorese <sup>1</sup>, Alessandra Folda <sup>1</sup>, Valeria Scalcon <sup>1</sup>, Stefania Ferro <sup>1</sup>, Giorgio Arrigoni <sup>1,2,3</sup>, Marco Bellamio <sup>4</sup>, Emiliano Feller <sup>4</sup>, Alberto Bindoli <sup>5</sup>, Oriano Marin <sup>1,\*</sup>, and Maria Pia Rigobello <sup>1,\*</sup>

<sup>1</sup> Department of Biomedical Sciences, University of Padova, via Ugo Bassi 58/b, 35131 Padova, Italy

<sup>2</sup> Proteomics Center, University of Padova and Azienda Ospedaliera di Padova

<sup>3</sup> CRIBI, Biotechnology Center, University of Padova

<sup>4</sup> Centrale del Latte di Vicenza, UO di Centrale del Latte d'Italia, via Alessandro Faedo, 60 Vicenza;

<sup>5</sup> Institute of Neuroscience (CNR), viale G. Colombo 3, 35131, Padova, Italy;

\* Correspondence: [mariapia.rigobello@unipd.it](mailto:mariapia.rigobello@unipd.it);

# These authors contributed equally

**Table S1.** Analysis of the antioxidant activity of 5-30% ACN *in vitro* and in a cellular model. ABTS and DPPH assays were performed for *in vitro* analysis and values were indicated respectively as TEAC ( $\mu\text{M}$  Trolox C) and percentage of DPPH scavenging inhibition. MTT test was carried out in order to evaluate cell viability in Caco-2 cells treated with the enriched peptide fraction for 24 h. Oxidative stress was induced with TbOOH (200  $\mu\text{M}$ ) for 18 h. n.d.: not detectable; \*\*\*  $p < 0.001$

|                    | <i>In vitro</i> analysis       |                                | Cell viability in Caco-2 cells |                         |
|--------------------|--------------------------------|--------------------------------|--------------------------------|-------------------------|
|                    | TEAC ( $\mu\text{M}$ Trolox C) | DPPH scavenging inhibition (%) | None                           | TbOOH                   |
| Cnt                | n.d.                           | n.d.                           | 100.00 $\pm$ 0.00              | 62.11 $\pm$ 7.19        |
| 5-30% ACN fraction | 0.57 $\pm$ 0.37 (***)          | 15.27 $\pm$ 5.98 (***)         | 123.26 $\pm$ 8.44              | 95.06 $\pm$ 10.96 (***) |

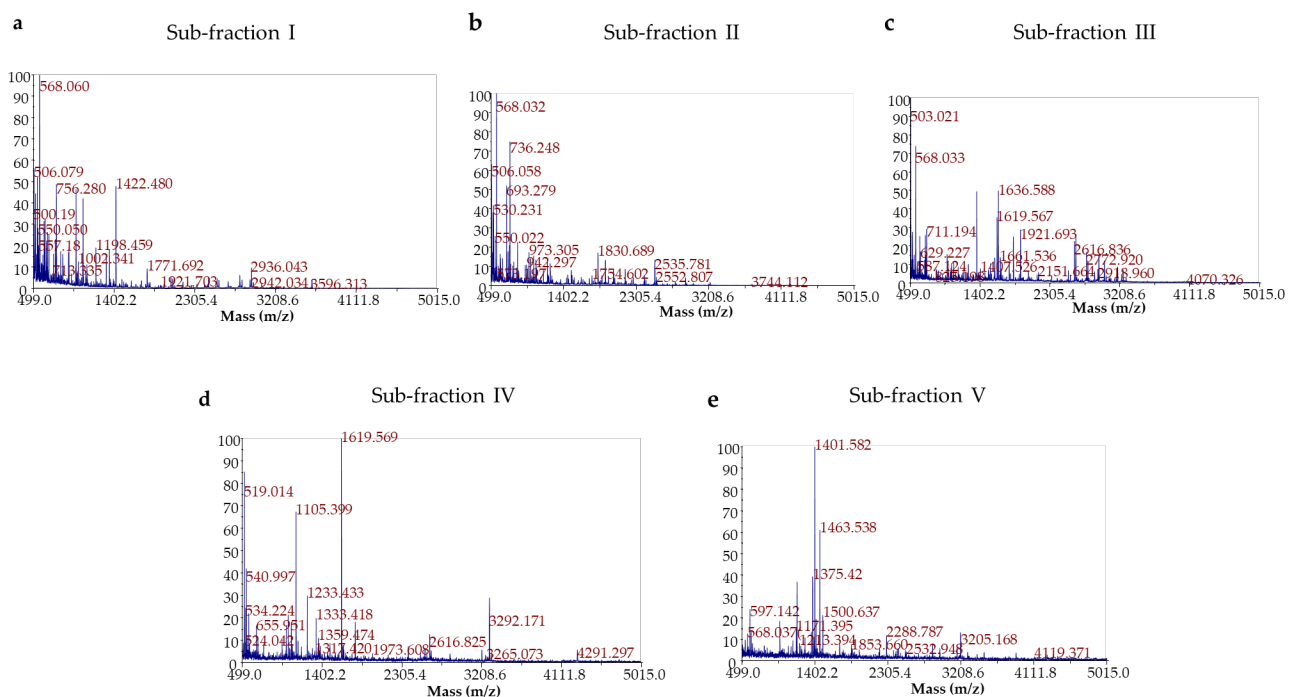

**Figure S1.** Examples of mass spectrometry spectra of sub-fractions I, II, III, IV and V. **a)** Sub-fraction I. **b)** Sub-fraction II. **c)** Sub-fraction III. **d)** Sub-fraction IV. **e)** Sub-fraction V.

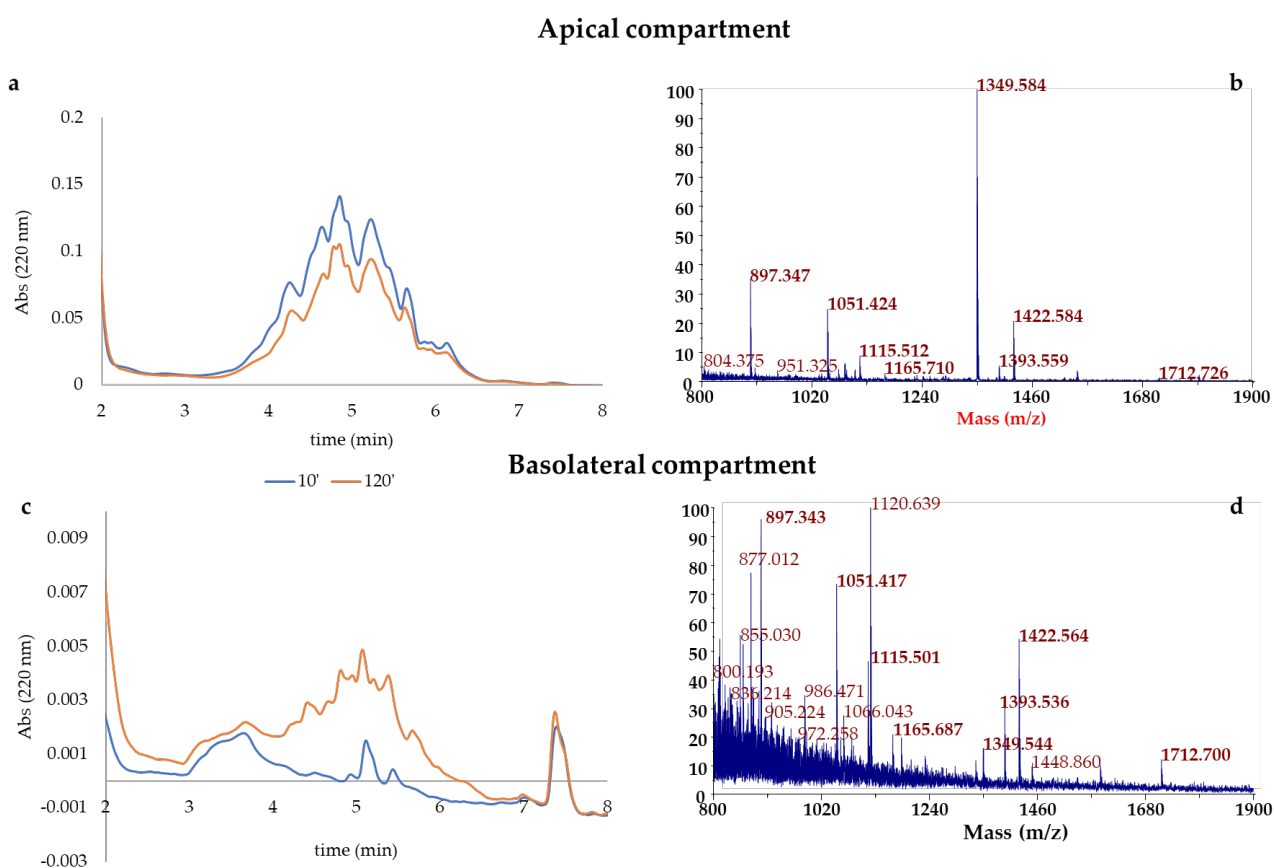

**Figure S2.** Transepithelial transport in Caco-2 cell monolayer of sub-fraction I. Cells were grown on Transwell inserts for 21 days to let their differentiation. Then the experiment was carried out as reported in Materials and Methods section. RP-HPLC analysis of apical (AP) compartment (a) and basolateral (BL) compartment (c) of cells treated with sub-fraction I for 10 min (blue) and 120 min (orange) are reported. Mass spectrometry analysis of AP compartment (b) and BL compartment (d) of cells treated with sub-fraction I for 120 min are depicted. Peptides that are able to cross the Caco-2 monolayer without modifications are reported in bold.

**Table S2.** Analysis of the antioxidant activity of sub-fractions I, II, III, IV and V *in vitro*. ABTS assay were performed for *in vitro* analysis and values were indicated respectively as TEAC ( $\mu\text{M}$  Trolox C). \*\*\*  $p < 0.001$

| Sub-fraction | TEAC ( $\mu\text{M}$ Trolox C) |
|--------------|--------------------------------|
| I            | $0.95 \pm 1.34$                |
| II           | $1.87 \pm 1.15$ (***)          |
| III          | $1.95 \pm 1.52$ (***)          |
| IV           | $2.64 \pm 1.41$ (***)          |
| V            | $2.78 \pm 1.18$ (***)          |

**Table S3. Files from Orbitrap analysis of sub-fraction I**

|      | Sequence                | # PSMs | # Proteins | # Protein Groups | Protein Group Accessions | Modifications | $\Delta Cn$ | q-Value | PEP         | IonScore | Exp Value   | Charge | MH+ [Da]   | $\Delta M$ [ppm] | RT [min] |
|------|-------------------------|--------|------------|------------------|--------------------------|---------------|-------------|---------|-------------|----------|-------------|--------|------------|------------------|----------|
| High | VNPESQQGSPR             | 3      | 2          | 1                | P02858                   |               | 0.0000      | 0       | 0.00001754  | 79       | 3.29476E-05 | 2      | 1198.58220 | 0.88             | 13.23    |
| High | REQDEDEDEDEDKPRPSRPSQG  | 2      | 2          | 1                | P02858                   |               | 0.0000      | 0       | 0.0000027   | 54       | 0.004150825 | 4      | 2614.12905 | 1.58             | 13.60    |
| High | KQGQHQQEEEEEGGSV        | 2      | 2          | 1                | P02858                   |               | 0.0000      | 0       | 0.00003189  | 51       | 0.010716809 | 2      | 1798.78740 | 1.95             | 12.92    |
| High | NNQLDQTPR               | 2      | 2          | 1                | P02858                   |               | 0.0000      | 0       | 0.0005204   | 50       | 0.019479559 | 2      | 1085.53459 | 1.05             | 14.78    |
| High | NALEPDHRVESEGG          | 1      | 3          | 2                | P02858;<br>A0A0R0GMV1    |               | 0.0000      | 0       | 0.005443    | 49       | 0.031992697 | 2      | 1509.69512 | 1.47             | 15.69    |
| High | EQDEDEDEDEDKPRPSRPSQG   | 1      | 2          | 1                | P02858                   |               | 0.0000      | 0       | 0.001727    | 47       | 0.009999094 | 3      | 2458.02976 | 2.42             | 13.95    |
| High | WQEQQDEDEDE             | 1      | 2          | 1                | P02858                   |               | 0.0000      | 0       | 0.0003587   | 44       | 0.002887334 | 2      | 1450.52458 | 0.30             | 16.65    |
| High | DEQIPSHPPR              | 1      | 2          | 1                | P02858                   |               | 0.0000      | 0       | 0.006591    | 37       | 0.572071635 | 2      | 1175.58232 | 1.63             | 15.86    |
| High | DEDEDEDEDEQIPSHPPRRPSHG | 1      | 2          | 1                | P02858                   |               | 0.0000      | 0       | 1.509E-08   | 36       | 0.169319411 | 4      | 2557.08559 | 1.28             | 16.00    |
| High | EQDEDEDEDEDKPRPSRPS     | 1      | 2          | 1                | P02858                   |               | 0.0000      | 0       | 0.0002238   | 33       | 0.296062992 | 3      | 2272.94785 | 1.80             | 14.01    |
| High | QGQHQQEEEEEGGSV         | 1      | 2          | 1                | P02858                   |               | 0.0000      | 0       | 0.002631    | 27       | 1.37252143  | 2      | 1670.69341 | 2.68             | 14.27    |
| High | KEQQQEQQQEEQPLE         | 1      | 1          | 1                | P0DO15                   |               | 0.0000      | 0       | 0.000009733 | 74       | 9.53075E-05 | 2      | 1898.87700 | 2.26             | 15.63    |
| High | IGINAENNQRN             | 1      | 1          | 1                | P0DO15                   |               | 0.0000      | 0       | 0.01234     | 67       | 0.000469711 | 2      | 1242.61943 | 0.68             | 15.67    |
| High | LFSREEGQQQGEQ           | 1      | 1          | 1                | P0DO15                   |               | 0.0000      | 0       | 0.01571     | 61       | 0.001976832 | 2      | 1535.71123 | 1.75             | 15.96    |
| High | SREEGQQQGEQRLQE         | 2      | 1          | 1                | P0DO15                   |               | 0.0000      | 0       | 7.355E-08   | 59       | 0.003467165 | 3      | 1801.84696 | 2.52             | 14.14    |
| High | FSREEGQQQGEQ            | 2      | 1          | 1                | P0DO15                   |               | 0.0000      | 0       | 0.002445    | 59       | 0.002160545 | 2      | 1422.62663 | 1.52             | 13.31    |
| High | KEQQQEQQQEEQPL          | 1      | 1          | 1                | P0DO15                   |               | 0.0000      | 0       | 0.01296     | 58       | 0.004813334 | 2      | 1769.83599 | 3.32             | 15.84    |
| High | EQQQEQQQEEQPLE          | 1      | 1          | 1                | P0DO15                   |               | 0.0000      | 0       | 0.0003122   | 54       | 0.005880889 | 2      | 1770.78081 | 1.73             | 16.99    |
| High | SLVNNDDRDS              | 3      | 1          | 1                | P0DO15                   |               | 0.0000      | 0       | 0.05486     | 48       | 0.026660789 | 2      | 1134.50237 | 0.13             | 16.34    |
| High | SREEGQQQGEQRLQES        | 1      | 1          | 1                | P0DO15                   |               | 0.0000      | 0       | 0.00000703  | 46       | 0.063416736 | 3      | 1888.87552 | 0.57             | 14.20    |
| High | VGLKEQQQEQ              | 1      | 1          | 1                | P0DO15                   |               | 0.0000      | 0       | 0.0264      | 44       | 0.091111039 | 2      | 1186.60820 | 1.61             | 14.25    |
| High | LKEQQQEQQQEEQPLE        | 2      | 1          | 1                | P0DO15                   |               | 0.0000      | 0       | 0.00008758  | 39       | 0.42622471  | 2      | 2011.96257 | 2.88             | 16.58    |
| High | VGLKEQQQEQQ             | 1      | 1          | 1                | P0DO15                   |               | 0.0000      | 0       | 0.02885     | 37       | 0.542579939 | 2      | 1314.66655 | 1.28             | 14.36    |
| High | QREEQEWPRKEEK           | 1      | 1          | 1                | P0DO15                   |               | 0.0000      | 0       | 0.00003053  | 25       | 10.75979545 | 4      | 1771.87368 | 0.79             | 13.47    |

|      |                                |   |   |   |                       |  |        |   |             |    |             |   |            |      |       |
|------|--------------------------------|---|---|---|-----------------------|--|--------|---|-------------|----|-------------|---|------------|------|-------|
| High | PQHPEREPQQPGEKEEDE             | 1 | 1 | 1 | P0DO15                |  | 0.0000 | 0 | 0.001634    | 24 | 6.904048974 | 3 | 2158.96762 | 1.83 | 13.66 |
| High | FGREGQQQGEE                    | 1 | 1 | 1 | P11827                |  | 0.0000 | 0 | 0.002668    | 60 | 0.001233267 | 2 | 1393.59844 | 0.36 | 14.21 |
| High | GREGQQQGEERLQE                 | 2 | 1 | 1 | P11827                |  | 0.0000 | 0 | 3.254E-08   | 59 | 0.002900604 | 3 | 1772.81980 | 2.21 | 14.58 |
| High | FVDAQPQQKEEGN                  | 3 | 1 | 1 | P11827                |  | 0.0000 | 0 | 0.008778    | 59 | 0.00288809  | 2 | 1489.69463 | 1.88 | 15.57 |
| High | FVDAQPQ                        | 1 | 3 | 2 | P11827;F7J077         |  | 0.0000 | 0 | 0.004484    | 51 | 0.023412219 | 2 | 804.38951  | 1.03 | 16.56 |
| High | GREGQQQGEERLQES                | 1 | 1 | 1 | P11827                |  | 0.0000 | 0 | 1.368E-07   | 50 | 0.020554019 | 3 | 1859.85184 | 2.11 | 14.59 |
| High | FVDAQPQQKEEG                   | 1 | 3 | 2 | P11827;F7J077         |  | 0.0000 | 0 | 0.001301    | 48 | 0.039871276 | 2 | 1375.65141 | 1.83 | 15.56 |
| High | TLVNNDDRDS                     | 2 | 3 | 2 | P11827;F7J077         |  | 0.0000 | 0 | 0.003046    | 45 | 0.057454064 | 2 | 1148.51921 | 1.17 | 14.72 |
| High | DEEQDKESQESEGSQREPR            | 2 | 1 | 1 | P11827                |  | 0.0000 | 0 | 0.000002046 | 39 | 0.074475433 | 4 | 2479.04726 | 0.81 | 13.72 |
| High | EREHPRPHQPHQKEEEKHE            | 2 | 1 | 1 | P11827                |  | 0.0000 | 0 | 0.00008161  | 34 | 1.664037557 | 4 | 2457.18374 | 2.85 | 8.26  |
| High | ERQQHGEKEEDEGEQPRP             | 1 | 1 | 1 | P11827                |  | 0.0000 | 0 | 3.237E-07   | 31 | 1.395967223 | 4 | 2177.98086 | 0.06 | 12.24 |
| High | EEEDQDEDEEQDKESQESEGSQREPR     | 1 | 1 | 1 | P11827                |  | 0.0000 | 0 | 0.000007023 | 27 | 0.226686836 | 4 | 3353.33632 | 2.44 | 14.76 |
| High | REHPRPHQPHQKEEEKHE             | 1 | 1 | 1 | P11827                |  | 0.0000 | 0 | 8.73251E-09 | 26 | 10.51995116 | 5 | 2328.14069 | 2.82 | 8.23  |
| High | EQDKESQESEGSQREPR              | 1 | 1 | 1 | P11827                |  | 0.0000 | 0 | 0.04485     | 23 | 6.231339126 | 3 | 2234.97910 | 1.52 | 12.34 |
| High | DEREHPRPHQPHQKEEEKHE           | 1 | 1 | 1 | P11827                |  | 0.0000 | 0 | 0.0001336   | 16 | 82.67284865 | 4 | 2572.21938 | 6.10 | 8.38  |
| High | QPHQEEEHEQKEEHEWHRKEE          | 1 | 1 | 1 | P11827                |  | 0.0000 | 0 | 0.02159     | 16 | 34.39622416 | 5 | 2808.23835 | 0.92 | 13.10 |
| High | HGGKGSEEEQDEREHPRPHQPHQKEEEKHE | 2 | 1 | 1 | P11827                |  | 0.0000 | 0 | 0.002019    | 14 | 92.62774546 | 7 | 3610.64238 | 0.55 | 8.53  |
| High | HEQKEEHEWHRKEE                 | 1 | 1 | 1 | P11827                |  | 0.0000 | 0 | 0.05024     | 12 | 167.7327612 | 4 | 1930.88540 | 3.24 | 8.47  |
| High | VVAEQGGEQGLE                   | 2 | 1 | 1 | A0A0R0GMV1            |  | 0.0000 | 0 | 5.523E-07   | 82 | 1.49779E-05 | 2 | 1215.58672 | 1.21 | 17.41 |
| High | NNQLDQNPR                      | 3 | 1 | 1 | A0A0R0GMV1            |  | 0.0000 | 0 | 0.02175     | 59 | 0.002769075 | 2 | 1098.52983 | 1.03 | 13.71 |
| High | VAEQGGEQGLE                    | 1 | 1 | 1 | A0A0R0GMV1            |  | 0.0000 | 0 | 0.003627    | 57 | 0.00395427  | 2 | 1116.51775 | 0.83 | 16.44 |
| High | NALEPDHRVESEGG                 | 1 | 3 | 2 | P02858;<br>A0A0R0GMV1 |  | 0.0000 | 0 | 0.005443    | 49 | 0.031992697 | 2 | 1509.69512 | 1.47 | 15.69 |
| High | AGNPDIEHPET                    | 1 | 1 | 1 | A0A0R0GMV1            |  | 0.0000 | 0 | 0.03474     | 45 | 0.053652047 | 2 | 1179.52861 | 0.76 | 16.24 |
| High | FVDAQPQQKEEGSKG                | 1 | 2 | 1 | F7J077                |  | 0.0000 | 0 | 1.466E-08   | 67 | 0.000658928 | 2 | 1647.80388 | 3.95 | 14.47 |
| High | FVDAQPQQKEEGS                  | 1 | 2 | 1 | F7J077                |  | 0.0000 | 0 | 0.01407     | 53 | 0.011572444 | 2 | 1462.68462 | 2.52 | 15.54 |
| High | FVDAQPQ                        | 1 | 3 | 2 | P11827;F7J077         |  | 0.0000 | 0 | 0.004484    | 51 | 0.023412219 | 2 | 804.38951  | 1.03 | 16.56 |
| High | FVDAQPQQKEEG                   | 1 | 3 | 2 | P11827;F7J077         |  | 0.0000 | 0 | 0.001301    | 48 | 0.039871276 | 2 | 1375.65141 | 1.83 | 15.56 |

|      |                   |    |   |   |               |  |        |   |             |    |             |   |            |       |       |
|------|-------------------|----|---|---|---------------|--|--------|---|-------------|----|-------------|---|------------|-------|-------|
| High | TLVNNDDRDS        | 2  | 3 | 2 | P11827;F7J077 |  | 0.0000 | 0 | 0.003046    | 45 | 0.057454064 | 2 | 1148.51921 | 1.17  | 14.72 |
| High | QRIPAGTT          | 1  | 2 | 1 | F7J077        |  | 0.0000 | 0 | 0.01148     | 31 | 1.315264888 | 2 | 843.47093  | 3.09  | 14.46 |
| High | LKVREDENNP        | 1  | 2 | 1 | F7J077        |  | 0.0000 | 0 | 0.05486     | 30 | 2.954393028 | 2 | 1213.61785 | 0.53  | 14.19 |
| High | IMSDESTESETEQ     | 1  | 2 | 1 | O64458        |  | 0.0000 | 0 | 0.000002172 | 88 | 6.47571E-07 | 2 | 1485.59160 | 1.22  | 16.37 |
| High | IMSDESTESETEQA    | 1  | 2 | 1 | O64458        |  | 0.0000 | 0 | 0.00009654  | 63 | 0.000252387 | 2 | 1556.62859 | 1.08  | 17.15 |
| High | YQEPQESQQRG       | 1  | 1 | 1 | P04405        |  | 0.0000 | 0 | 0.0009055   | 55 | 0.006528817 | 2 | 1349.61199 | 2.90  | 14.13 |
| High | YLAGNQEQE         | 17 | 2 | 2 | P04776;P04405 |  | 0.0000 | 0 | 0.0109      | 54 | 0.007138189 | 2 | 1051.46929 | 0.17  | 22.14 |
| High | RNLQGENEEDSGA     | 1  | 1 | 1 | P04405        |  | 0.0000 | 0 | 0.0000809   | 52 | 0.005817199 | 2 | 1547.66057 | 2.36  | 14.54 |
| High | MRKPQQEEDDDDE     | 1  | 1 | 1 | P04405        |  | 0.0000 | 0 | 0.02409     | 41 | 0.03625453  | 2 | 1634.66533 | 3.28  | 12.65 |
| High | RQNIGQNSSPD       | 2  | 1 | 1 | P04405        |  | 0.0000 | 0 | 0.02188     | 41 | 0.180812407 | 2 | 1215.57109 | -0.17 | 13.18 |
| High | FNENESGDQV        | 1  | 1 | 1 | P05046        |  | 0.0000 | 0 | 0.006334    | 61 | 0.000571086 | 2 | 1138.46489 | 0.11  | 17.17 |
| High | NKVDENGTPKPS      | 4  | 1 | 1 | P05046        |  | 0.0000 | 0 | 0.002978    | 57 | 0.005876098 | 2 | 1285.63957 | 0.97  | 12.00 |
| High | GGTGGTDYGTGGTG    | 1  | 1 | 1 | K7LEQ5        |  | 0.0000 | 0 | 0.0057      | 78 | 1.279E-05   | 2 | 1258.52141 | 2.49  | 15.19 |
| High | YGNVEKQTDE        | 1  | 1 | 1 | K7LEQ5        |  | 0.0000 | 0 | 0.0003858   | 47 | 0.030024099 | 2 | 1182.52995 | 2.19  | 14.13 |
| High | YGTNTADTGTGPR     | 1  | 1 | 1 | K7LEQ5        |  | 0.0000 | 0 | 0.001024    | 41 | 0.187711656 | 2 | 1310.60063 | 2.63  | 14.68 |
| High | NLQGENEGEDKGA     | 1  | 1 | 1 | P04776        |  | 0.0000 | 0 | 0.007443    | 54 | 0.005853614 | 2 | 1360.59941 | 1.33  | 13.99 |
| High | YLAGNQEQE         | 17 | 2 | 2 | P04776;P04405 |  | 0.0000 | 0 | 0.0109      | 54 | 0.007138189 | 2 | 1051.46929 | 0.17  | 22.14 |
| High | IKPPTDEQQQRPQE    | 2  | 1 | 1 | P04776        |  | 0.0000 | 0 | 0.0218      | 41 | 0.273058321 | 2 | 1693.85539 | 2.91  | 15.43 |
| High | VIKPPTDEQQQRPQE   | 1  | 1 | 1 | P04776        |  | 0.0000 | 0 | 0.00006892  | 39 | 0.449881374 | 3 | 1792.91965 | 0.43  | 15.98 |
| High | IKPPTDEQQQRPQEE   | 1  | 1 | 1 | P04776        |  | 0.0000 | 0 | 0.0004184   | 32 | 2.554844876 | 3 | 1822.89640 | 1.83  | 15.51 |
| High | VIKPPTDEQQQRPQEE  | 1  | 1 | 1 | P04776        |  | 0.0000 | 0 | 0.000217    | 28 | 5.829024329 | 3 | 1921.96305 | 0.81  | 16.17 |
| High | IKPPTDEQQQRPQEEEE | 1  | 1 | 1 | P04776        |  | 0.0000 | 0 | 0.001827    | 25 | 9.864223021 | 3 | 2080.98337 | 2.46  | 15.83 |
| High | GKHQQEENEENEGGSI  | 1  | 1 | 1 | P04776        |  | 0.0000 | 0 | 0.04737     | 23 | 8.540962679 | 2 | 1541.68645 | 2.42  | 13.54 |
| High | IKPPTDEQQQRPQEEEE | 1  | 1 | 1 | P04776        |  | 0.0000 | 0 | 0.03119     | 20 | 34.28549271 | 3 | 1951.93778 | 1.08  | 15.76 |
| High | QAALQTPK          | 1  | 3 | 1 | I1L860        |  | 0.0000 | 0 | 0.04134     | 42 | 0.075457449 | 2 | 856.48949  | 0.88  | 15.05 |
| High | QAALQTPKG         | 1  | 3 | 1 | I1L860        |  | 0.0000 | 0 | 0.02992     | 31 | 1.144109738 | 2 | 913.51079  | 0.64  | 15.38 |

**Table S4.** Residues involved in the binding of Keap1 with the analyzed peptides. The residues involved in the binding between Keap1 and Nrf2 are highlighted in red

| Keap 1 | N-14-G   | K-14-L   | H-14-E  | M-13-E  | G-14-I | D-10-R | S-10-S | F-12-G     | V-11-R | I-11-N  | F-12-E      | Y-9-E  |
|--------|----------|----------|---------|---------|--------|--------|--------|------------|--------|---------|-------------|--------|
| Y 334  | H7       | E2       |         |         |        |        | N5     | P6         | R11    |         |             |        |
| R 336  |          |          | E5      |         |        |        |        |            |        |         | K9          |        |
| S 363  |          |          | R11     |         | G12    |        |        |            |        | Q9      | E10         |        |
| R 380  | E10, E12 | L14      | K4      | E8      | E10    | S6     | D9     | D3, Q5, Q8 |        |         | E10         | Q7, E9 |
| N 382  |          |          | E5      |         |        | H7     |        | Q5         |        | R10     | Q8          |        |
| D 385  |          |          | Q3      |         |        |        |        |            |        | R10     |             |        |
| N 387  | E12      |          | H1, E5  |         |        |        |        | D3         |        |         |             |        |
| D 389  |          |          | Q3      | Q6      | K2     |        |        |            |        |         |             |        |
| N 414  | R8       | E6       | E14     |         | E10    |        | R8     |            |        |         |             |        |
| R 415  | D6       | E6       | E8, E14 | D9, D11 |        | E2     | N5, D7 | D3, G12    | Q7     | E6, N11 | F1, Q5, E12 | E9     |
| S 431  |          | E6       |         | E7      |        |        |        |            |        |         |             |        |
| H 432  | G 14     |          |         |         |        |        |        |            |        |         |             |        |
| H 436  |          |          |         | E7      |        |        |        |            |        |         |             |        |
| R 483  |          | E10; E11 | E8      | D9, D10 |        |        |        | E11        | E4     | E6      | F2          |        |
| S 508  |          |          |         |         |        |        |        |            |        | E6      |             |        |
| Y 525  |          |          |         |         |        |        | V3     |            |        |         | D3          |        |
| Q 530  |          |          |         |         |        |        |        | E10        |        | E6      |             |        |
| Y 572  |          |          |         |         | E6     |        |        |            | R11    |         | K9          |        |
| S 602  | D6       | Q12      | R11     | D12     | S13    |        |        |            |        | N7      | G10         |        |

**Table S5.** ABTS assay with identified soy peptides (0.05 mg/mL). Values were indicated as TEAC ( $\mu\text{M}$  Trolox)

| Peptide | TEAC ( $\mu\text{M}$ Trolox) |
|---------|------------------------------|
| N-14-G  | $0.12 \pm 0.22$              |
| K-14-L  | $0.34 \pm 0.20$              |
| H-14-E  | $0.63 \pm 0.27$              |
| M-13-E  | $0.25 \pm 0.13$ (***)        |
| G-14-I  | $0.14 \pm 0.43$              |
| D-10-R  | n.d.                         |
| S-10-S  | n.d.                         |
| F-12-G  | n.d.                         |
| V-11-R  | n.d.                         |
| I-11-N  | n.d.                         |
| F-12-E  | n.d.                         |
| Y-9-E   | n.d.                         |
| F-12-Q  | n.d.                         |

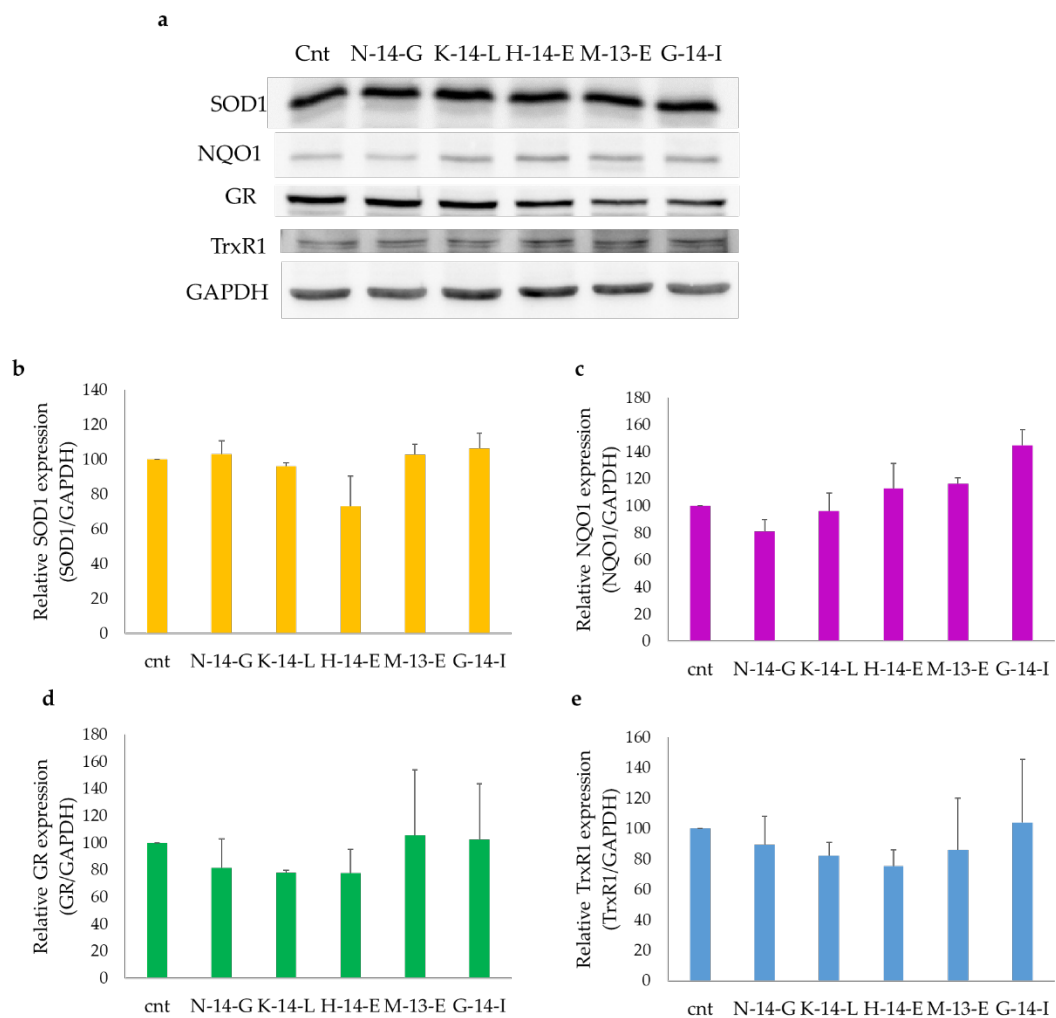

**Figure S3.** Western Blot analysis of antioxidant and phase II enzymes in Caco-2 cell lysates treated with N-14-G, K-14-L, H-14-E, M-13-E and G-14-I (0.05 mg/mL) for 24 h (a). **b-e)** Quantification of the above reported Western Blot.

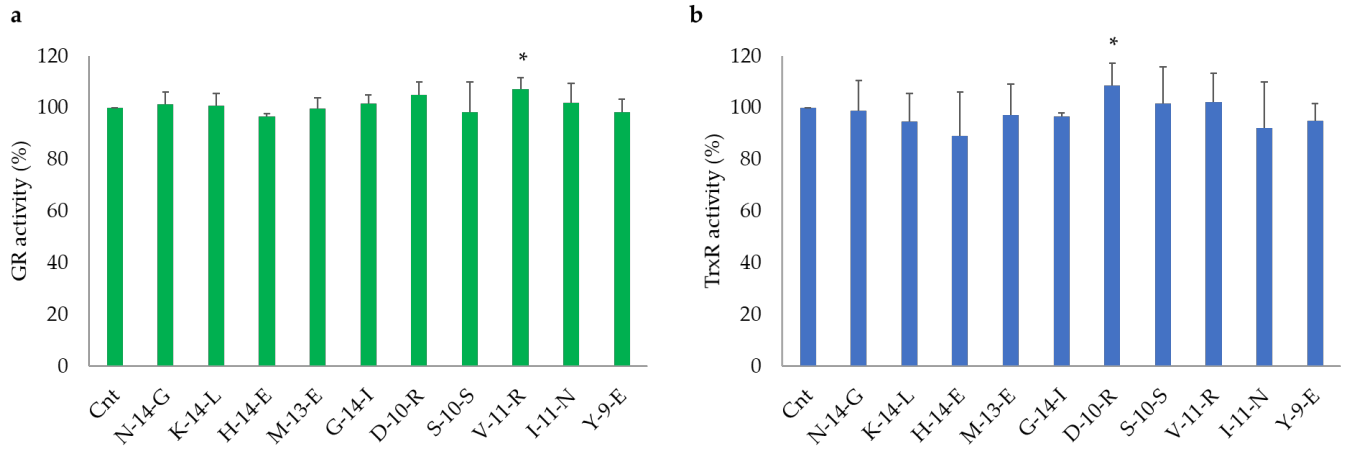

**Figure S4.** GR (a) and TrxR activity (b) in Caco-2 cell lysates treated with soy peptides (0.05 mg/mL) for 24 h.

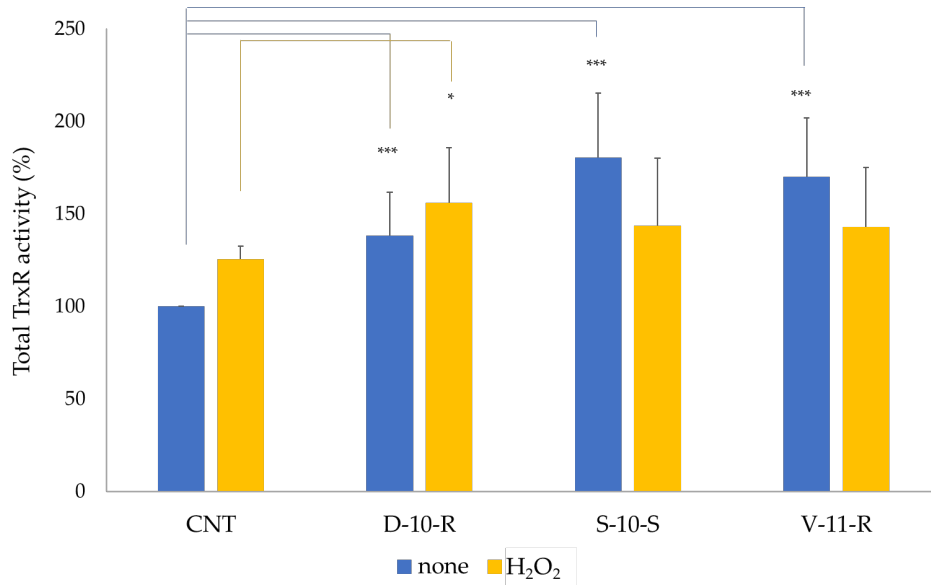

**Figure S5.** Total TrxR activity (%) in Caco-2 cells treated with **D-10-R**, **S-10-S** and **V-11-R** (0.05 mg/mL) in the presence or absence of 2.5 mM H<sub>2</sub>O<sub>2</sub> for 48 h.
